# Supplementary material for: Variation in Type A Trichothecene Production and Trichothecene Biosynthetic Genes in Fusarium goolgardi from Natural Ecosystems of Australia
Source: Toxins (Basel). 2015 Nov 5;7(11):4577–94. doi: 10.3390/toxins7114577 (PMC4663521; doi:10.3390/toxins7114577)
Supplement: Supplementary file 1 [file toxins-07-04577-s001.xlsx]

## Sheet: Table 1
						Table S1. Fusarium strains used in this study.
Isolate Accession a	Species	Host Plant	Origin	NCBI Accession
				RPB1 d	RPB2	TRI1	TRI3	TRI4	TRI5	TRI7	TRI8	TRI11	TRI13	TRI16	TRI101
RBG5411	F. goolgardi	Xanthorrhoea glauca	Bungonia, Australia	KP083270.1	KP083280.1	KT597908	KT597749	KT597757	KT597778	KT597802	KT597831	KT597866	KT597891	KT597896	KT597837
RBG5417	F. goolgardi	Xanthorrhoea glauca	Bungonia, Australia	KT597705	KT597721	KT597907	KT597748	KT597759	KT597777	KT597803	KT597826	KT597869	KT597890	KT597895	KT597839
RBG5419	F. goolgardi	Xanthorrhoea glauca	Khancoban, Australia	KT597707	KT597724	KT597906	KT597750	KT597758	KT597775	KT597804	KT597824	KT597867	KT597888	KT597893	KT597836
RBG5420	F. goolgardi	Xanthorrhoea glauca	Tumut, Australia	KT597706	KT597723	KT597905	KT597751	KT597756	KT597776	KT597805	KT597829	KT597868	KT597889	KT597894	KT597838
RBG5421	F. goolgardi	Xanthorrhoea glauca	Yass, Australia	KT597701	KT597722	KT597915	KT597732	KT597754	KT597774	KT597806	KT597827	KT597865	KT597885	KT597903	KT597840
RBG5422	F. goolgardi	Xanthorrhoea glauca	Yass, Australia	KT597704	KT597726	KT597916	KT597733	KT597753	KT597779	KT597807	KT597830	KT597863	KT597887	KT597904	KT597843
RBG6914	F. goolgardi	Xanthorrhoea glauca	Yass, Australia	KT597703	KT597727	KT597913	KT597735	KT597760	KT597773	KT597809	KT597828	KT597862	KT597886	KT597902	KT597842
RBG6915	F. goolgardi	Xanthorrhoea glauca	Yass, Australia	KT597702	KT597725	KT597914	KT597734	KT597755	KT597772	KT597808	KT597825	KT597864	KT597884	KT597901	KT597841
RBG3543 b	F. armeniacum	N/A c	USA	KT597716	KT597728	KT597912	KT597747	KT597768	KT597786	KT597810	KT597820	KT597871	KT597879	KT597900	KT597849
FRC R-09335	F. armeniacum	N/A	USA	KT597715	GQ915485.1	GQ915524.1	KT597746	GQ915530.1	GQ915543.1	KT597801	KT597819	GQ915556.1	KT597880	GQ915524.1	GQ915571.1
FRC R-07843	F. sambucinum	N/A	USA	KT597720	GQ915496.1	GQ915521.1	KT597752	GQ915539.1	GQ915552.1	KT597811	KT597832	GQ915565.1	KT597892	GQ915521.1	GQ915580.1
NRRL53421	F. sibiricum	Barley	Tuva, Russia	KT597709	HQ154463.1	HQ594540.1	KT597737	KT597766	KT597789	KT597793	KT597815	KT597857	KT597874	HQ594540.1	KT597846
NRRL53427	F. sibiricum	Barley	Irkutsk, Russia	KT597710	HQ154469.1	HQ594541.1	KT597736	KT597767	KT597788	KT597794	KT597814	KT597858	KT597875	HQ594541.1	KT597847
NRRL29977	F. sporotrichioides	N/A	Former Yugoslavia	KT597711	HQ154451.1	HQ594536.1	KT597738	KT597764	KT597787	KT597792	KT597813	KT597856	KT597873	HQ594536.1	KT597835
NRRL29978	F. sporotrichioides	N/A	Former Yugoslavia	KT597708	HQ154452.1	HQ594537.1	KT597739	KT597765	KT597790	KT597791	KT597812	KT597870	KT597872	HQ594537.1	KT597834
NRRL3299	F. sporotrichioides	Maize	France	JX171444.1	JX171558.1	AY040587.1	U22463.1	U22462.1	AF364179.1	U22463.1	U22463.1	AF011355.1	AF330109.21	AY187275.1	KT597833
NRRL53410	F. langsethiae	Oat	Satakunta, Finland	KT597712	HQ154456.1	HQ594538.1	KT597740	KT597762	KT597782	KT597795	KT597817	KT597853	KT597876	HQ594538.1	KT597845
NRRL53417	F. langsethiae	Oat	Uusimaa, Finland	KT597713	HQ154460.1	HQ594539.1	KT597741	KT597761	KT597781	KT597796	KT597816	KT597855	KT597877	HQ594539.1	KT597844
NRRL53439	F. langsethiae	Oat	Vologda, Russia	KT597714	HQ154479.1	HQ594543.1	KT597742	KT597763	KT597780	KT597797	KT597818	KT597854	KT597878	HQ594543.1	KT597848
NRRL54050	F. palustre	Spartina alterniflora	Maine, Wells, USA	KT597717	KT597729	KT597911	KT597743	KT597770	KT597784	KT597798	KT597821	KT597861	KT597883	KT597899	KT597852
NRRL54056	F. palustre	Spartina alterniflora	Connecticut, USA	KT597718	KT597731	KT597909	KT597745	KT597769	KT597783	KT597799	KT597822	KT597860	KT597881	KT597897	KT597851
NRRL54058	F. palustre	Spartina alterniflora	Connecticut, USA	KT597719	KT597730	KT597910	KT597744	KT597771	KT597785	KT597800	KT597823	KT597859	KT597882	KT597898	KT597850
a Isolate accessions: FRC: Fusarium Research Centre culture collection at Pennsylvania State University, State College, PA, USA; NRRL: Northern Regional Research Centre culture collection at the United States Department of Agriculture (USDA), Agricultural Research Service (ARS), Peoria, IL, USA; RBG: Royal Botanic Gardens culture collection at the Royal Botanic Gardens and Domain Trust, Sydney, N…
b Isolate RBG3543 was provided by Professor John Leslie, Kansas State University, USA;
c Not available;
d Loci used in this study: RNA Polymerase II Largest (RPB1) and Second Largest (RPB2) Subunits; trichothecene (TRI) cluster (TRI3, TRI4, TRI5, TRI7, TRI8, TRI11, and TRI13); the two-gene TRI1-TRI16 locus and the single-gene TRI101 locus.
