# Supplementary material for: Variation in Type A Trichothecene Production and Trichothecene Biosynthetic Genes in Fusarium goolgardi from Natural Ecosystems of Australia
Source: PubMed Central journal article supplement (PMC4663521; doi:10.3390/toxins7114577), 2015-11-05
Supplement: toxins-07-04577-s002.pdf [file toxins-07-04577-s002.pdf]

## Supplementary Materials

**Table S2.** PCR and sequencing primers used in this study.

| Gene          | Primer Designation | Primer Sequence (5'-3')            | Reference                           |
|---------------|--------------------|------------------------------------|-------------------------------------|
| <i>RPB1</i>   | Fa <sup>a</sup>    | CAYAARGARTCYATGATGGGWC             | O'Donnell <i>et al.</i> [37]        |
|               | F5                 | ATGGGTATYGTCCAGGAYTC               |                                     |
|               | F7                 | CRACACAGAAGAGTTTGAAGG              |                                     |
|               | F8                 | TTCTTCCACGCCATGGCTGGTCG            |                                     |
|               | G2R <sup>a</sup>   | GTCATYTGDTGCDGGYTCDC               |                                     |
| <i>RPB2</i>   | 5F2                | GGGGWGAYCAGAAGAAGGC                | O'Donnell <i>et al.</i> [37]        |
|               | 7cR                | CCCATRGTGTGTTTRCCCAT               |                                     |
|               | 7cF                | ATGGGYAARCAAGCYATGGG               |                                     |
|               | 11aR               | GCRTGGATCTTRTCRTCSACC              |                                     |
| <i>TRI1</i>   | 1285               | GCGTCTCAGCTTCATCAAGGCAKCKAMTGAWTCG | Proctor <i>et al.</i> [9]           |
|               | 1292               | CTTGACTTSMTTGGCKGCAAAGAARCGACCA    |                                     |
| <i>TRI3</i>   | 1912               | TGTGTMGGYGCWGAGGCVATYGTGG          | Proctor <i>et al.</i> [9]           |
|               | 1914               | ACRGCAGCRGTCTGRCACATGGCGTA         |                                     |
| <i>TRI4</i>   | 1450               | ACCTTGAGTTCTACCATGAAGTCATC         | Proctor <i>et al.</i> [9]           |
|               | 1452               | GTTATCCTGTTTGCWGGTACTGAGAC         |                                     |
|               | 1453               | GTCTCAGTACCWGC AAACAGGATAAC        |                                     |
|               | 1455               | ACCTTGAGTTCTACCATGAAGTCATC         |                                     |
| <i>TRI5</i>   | 1558               | GGCATGGTCGTGTACTCTTGGGTCAAGGT      | Proctor <i>et al.</i> [9]           |
|               | 1559               | GCCTGMYCAWAGAA YTTGCRGA ACTT       |                                     |
| <i>TRI7</i>   | 3870 <sup>a</sup>  | GCACSTATKCTGCGCTGATCATC            | Proctor, R.H.<br>(unpublished data) |
|               | 3871 <sup>a</sup>  | CCARATGTAGCCTACAAGCTTGTG           |                                     |
|               | 3872               | GGACGCCAMYGCCGAGCAATGG             |                                     |
|               | 3873               | CCAAAMASCGGCGGCCATTGTTG            |                                     |
| <i>TRI8</i>   | 3759               | GGATTTGAGARYRCYGAGCCTGGAAC         | Proctor, R.H.<br>(unpublished data) |
|               | 3762               | GTGACCTCRTRKRGATAGCTTGG            |                                     |
| <i>TRI11</i>  | 1482 <sup>a</sup>  | CACACYCTCCTSATGCTYGTGGACT          | Proctor <i>et al.</i> [9]           |
|               | 1483 <sup>a</sup>  | TCCCAMACTGYCTYGCCAGCATCAT          |                                     |
|               | 1486               | GTTGYCTTGAYA ACTCKACTTACCA         |                                     |
|               | 1487               | TGCAWYGCCACATRTRCGTTCTCAAC         |                                     |
| <i>TRI13</i>  | 3874 <sup>a</sup>  | CTTGCCGACTTTCGYGAGACVCAAG          | Proctor, R.H.<br>(unpublished data) |
|               | 3875 <sup>a</sup>  | GTCRACCWTGGMCAARCGTTGAAGTGC        |                                     |
|               | 3876               | GGGCTTTGGCTARATCAATTGTTGC          |                                     |
|               | 3877               | CAAGGHGICYGTRTTGGATGCTGT           |                                     |
| <i>TRI16</i>  | 1472               | CCTCTCTCCCTTGAYCAATTRA ACTCT       | Proctor <i>et al.</i> [9]           |
|               | 1477               | CAATATACGGATACCGCACAAAGACTGG       |                                     |
| <i>TRI101</i> | 2067               | GGCATYAGCGARGGAAACACAGGA           | Proctor, R.H.<br>(unpublished data) |
|               | 2068               | AGGCTTCTTGGGCATAAAGTACATC          |                                     |

<sup>a</sup> Primers used for PCR reactions.
